# Supplementary material
Source: publisher site journal article supplement (https://www.dovepress.com/article/555051)
Supplement: Supplementary file 1 [file Supplementary_Material.pdf]

Figure S1

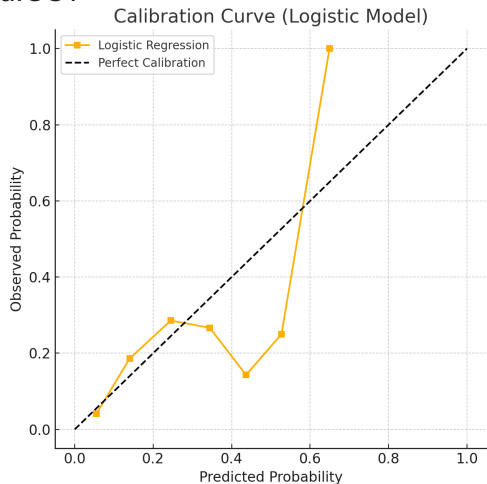

Figure S2

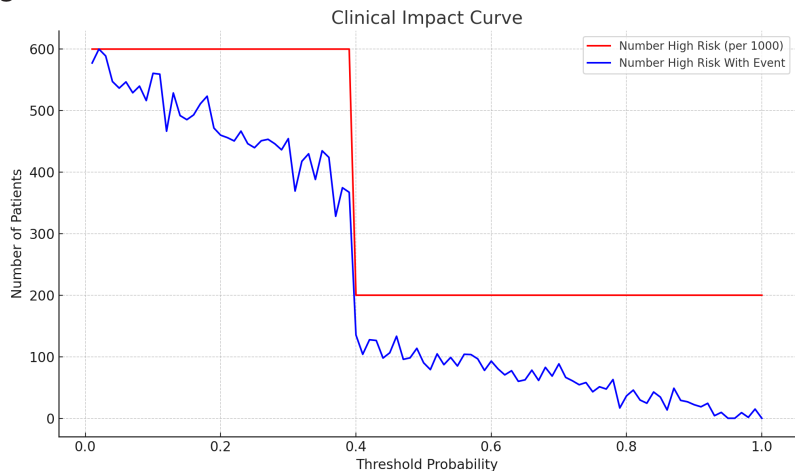

Figure S3

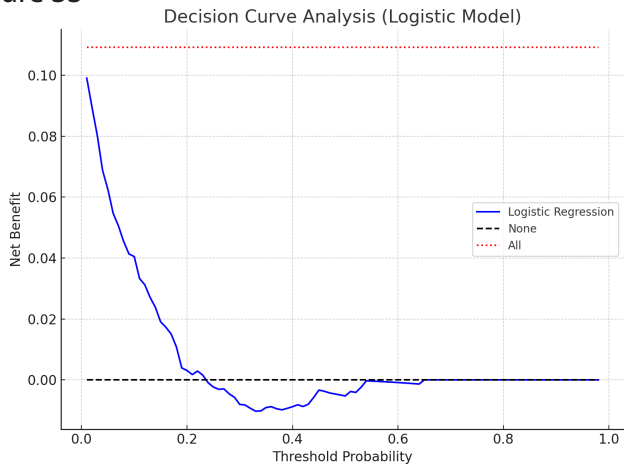

Figure S4

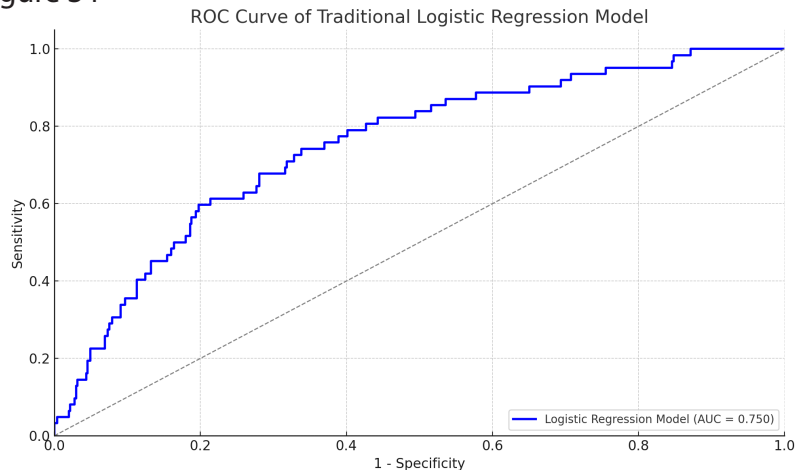

Figure S5

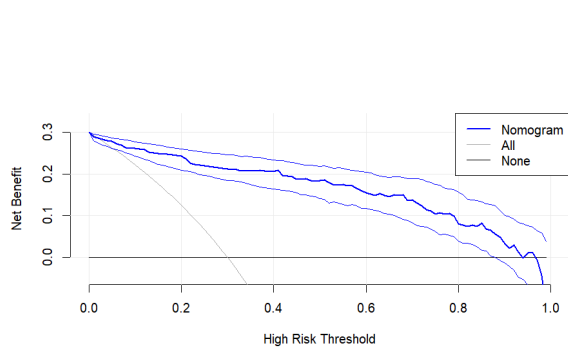

Figure S6

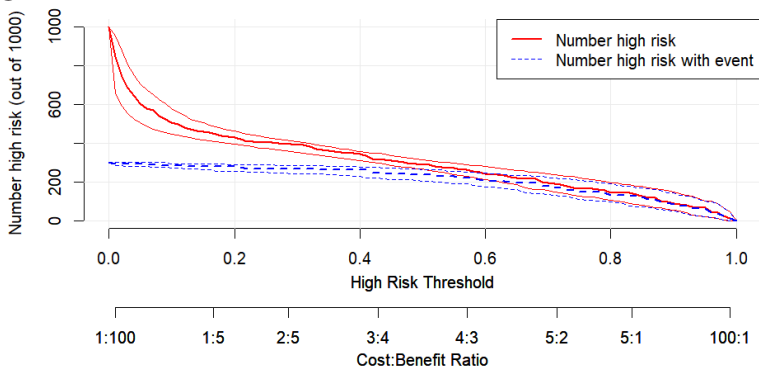

**Supplementary Table 1**

| Variable                  | Coefficient  |
|---------------------------|--------------|
| Age                       | 0.011778731  |
| Coronary heart disease    | -0.006040097 |
| Duration of dust exposure | 0.098139034  |
| Dyspnea                   | 0.152077773  |
| SpO <sub>2</sub> (%)      | -0.086191203 |
| Serum kalium              | 0.030191756  |
| Neutrophil                | 0.005764907  |
| CRP                       | 0.007901391  |
| IL-6                      | 0.006991769  |

**Supplementary Table 2**

| Variable                  | Selection Frequency (out of 1000 resamples) |
|---------------------------|---------------------------------------------|
| Age                       | 917                                         |
| Coronary heart disease    | 668                                         |
| Duration of dust exposure | 954                                         |
| Dyspnea                   | 978                                         |
| SpO <sub>2</sub> (%)      | 931                                         |
| Serum kalium              | 812                                         |
| Neutrophil                | 883                                         |
| CRP                       | 995                                         |
| IL-6                      | 992                                         |

**Note:****Supplementary Figure S1**

Calibration curve of the logistic regression model for predicting survival in patients with pneumoconiosis. The curve shows good agreement between predicted and observed outcomes.

**Supplementary Figure S2**

Clinical impact curve of the prediction model showing the number of high-risk patients and true positive cases across different threshold probabilities.

**Supplementary Figure S3**

Decision curve analysis of the logistic regression model demonstrating the net clinical benefit across a range of threshold probabilities.

**Supplementary Figure S4**

ROC curve of the traditional logistic regression model for survival prediction in pneumoconiosis patients.

**Supplementary Figure S5**

Decision curve analysis of the nomogram model for survival prediction.

**Supplementary Figure S6**

Clinical impact curve of the nomogram model showing predicted high-risk populations and true events.

**Supplementary Table 1**

Features selected by LASSO regression and their corresponding coefficients.

**Supplementary Table 2**

Selection frequencies of LASSO-selected variables across 1000 bootstrap iterations.
